# Supplementary material for: Development of an Attenuated Tat Protein as a Highly-effective Agent to Specifically Activate HIV-1 Latency
Source: PubMed Central journal article supplement (PMC5113098; doi:10.1038/mt.2016.117), 2016-07-19
Supplement: mt2016117x1.pdf [file mt2016117x1.pdf]

| Round1 Mutations |     | Transactivation Activity | Round2 Mutations |           | Transactivation Activity |
|------------------|-----|--------------------------|------------------|-----------|--------------------------|
| R1M1             | M22 | -/-                      | R2M1             | M8,10     | -/-                      |
| R1M2             | M23 | +/+                      | R2M2             | M11,12    | -/-                      |
| R1M3             | M36 | +/+                      | R2M3             | M22,23    | +/-                      |
| R1M4             | M39 | +/+                      | R2M4             | M28,29    | -/-                      |
| R1M5             | M51 | +/+                      | R2M5             | M46,47    | -/-                      |
| R1M6             | M60 | -/-                      | R2M6             | M36,39    | +/+                      |
| R1M7             | M61 | -/-                      | R2M7             | M66,67    | +/+                      |
| R1M8             | M62 | -/-                      | R2M8             | M66,68    | +/+                      |
| R1M9             | M63 | -/-                      | R2M9             | M66,69    | +/+                      |
| R1M10            | M64 | -/-                      | R2M10            | M67,68    | +/+                      |
| R1M11            | M65 | -/-                      | R2M11            | M67,69    | +/+                      |
| R1M12            | M66 | +/+                      | R2M12            | M68,69    | +/+                      |
| R1M13            | M67 | +/+                      |                  |           |                          |
| R1M14            | M68 | +/+                      | Round3 Mutations |           |                          |
| R1M15            | M69 | +/+                      | R3M1             | M66,67,68 | +/+                      |
| R1M16            | M70 | -/-                      | R3M2             | M66,67,69 | +/+                      |
| R1M17            | M71 | -/-                      | R3M3             | M66,68,69 | +/+                      |
| R1M18            | M72 | -/-                      | R3M4             | M67,68,69 | +/+                      |

**Supplementary Table1:**

**Mutation Round1-3 and Detection of Transactivation Activity**

+/+, >70% wild type; +/- , > 20% wild type activity; -/- , 20% or <20% wild type activity.

Amino acids in mutation sites are all turned to Ala(gca).

| Round4 Mutations |              | Transactivation activity | Apoptosis | Round5 Mutations |                    | Transactivation activity | Apoptosis |
|------------------|--------------|--------------------------|-----------|------------------|--------------------|--------------------------|-----------|
| R4M1             | M28,29,46,47 | -/-                      | ND        | R5M1             | M36,39,66,67,68    | -/-                      | -/-       |
| R4M2             | M22,23,46,47 | -/-                      | ND        | R5M2             | M36,66,67,68,77    | +/-                      | -/-       |
| R4M3             | M66,67,68,69 | -/-                      | ND        | R5M3             | M51,36,66,67,68    | +/-                      | -/-       |
| R4M4             | M36,66,67,68 | +/-                      | -/-       | R5M4             | M36,66,67,68,77    | +/+                      | -/-       |
| R4M5             | M39,66,67,68 | +/+                      | -/-       | Round6 Mutations |                    | Transactivation activity | Apoptosis |
| R4M6             | M51,66,67,68 | +/-                      | ND        | R6M1             | M51,77,36,66,67,68 | -/-                      | ND        |
| R4M7             | M77,66,67,68 | +/+                      | -/-       | R6M2             | M51,77,39,66,67,68 | -/-                      | ND        |
| R4M8             | M36,67,68,69 | -/-                      | ND        | R6M3             | M51,36,39,66,67,68 | +/-                      | ND        |
| R4M9             | M39,66,68,81 | -/-                      | ND        | R6M4             | M36,51,66,67,68,77 | +/-                      | ND        |
| R4M10            | M51,39,66,68 | -/-                      | ND        | R6M5             | M39,51,66,67,68,77 | -/-                      | ND        |

### Supplementary Table2:

#### Mutation Round 4-6 and Detection of Transactivation Activity and Apoptosis

+/, >70% wild type; +/- , > 20% wild type activity; -/- , 20% or <20% wild type activity.

Amino acids in mutation sites are all turned to Ala(gca).

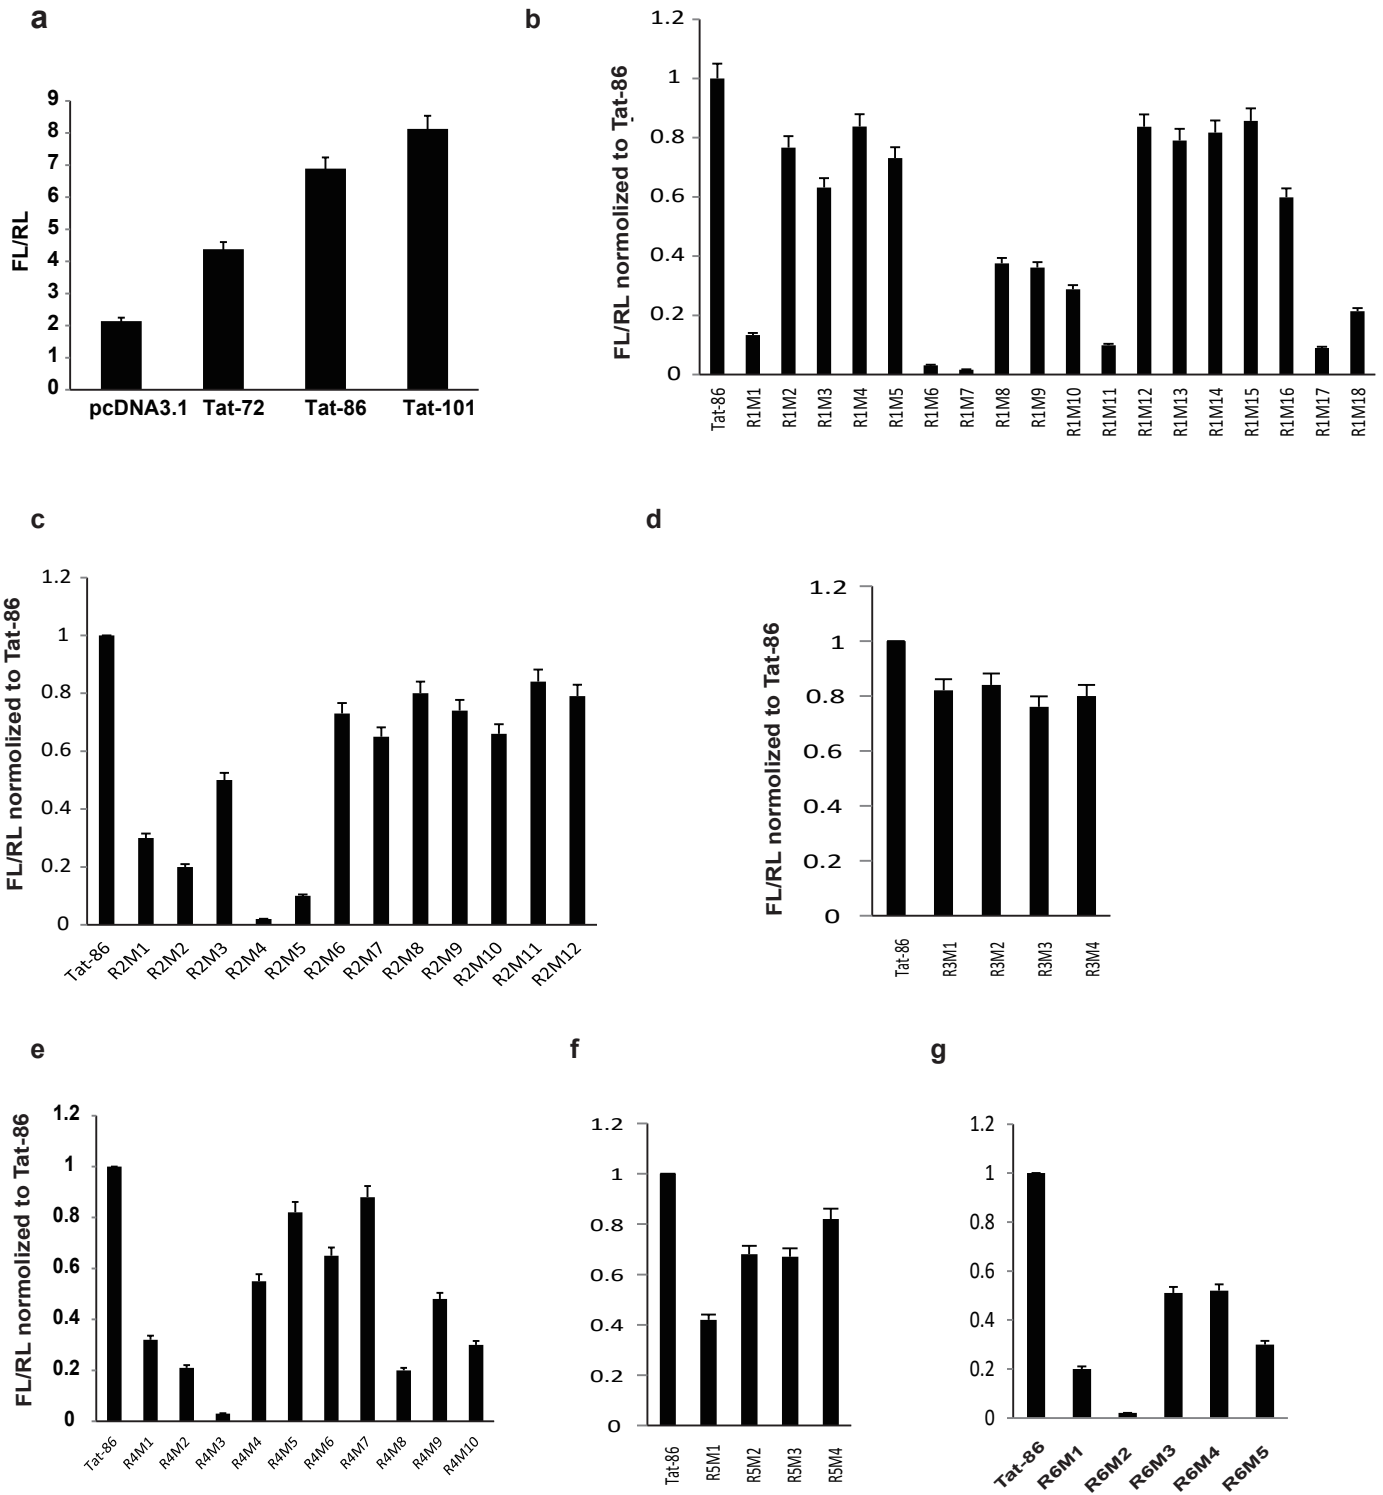

**Supplementary Figure 1:** Transactivation activity of HIV-1 Tat and Tat mutants. (a) TZM-bl cells were co-transfected with Relina and 100ng of pcDNA3.1, pcDNA3.1-Tat-72, pcDNA3.1-Tat-86 or pcDNA3.1-Tat-101. Ratio of Firefly Luciferase/Relina Luciferase (FL/RL ratio) was analyzed after 48 hours. (b-g) Transactivation activity of products of Mutation Round 1-6 were analyzed and normalized to Tat-86.

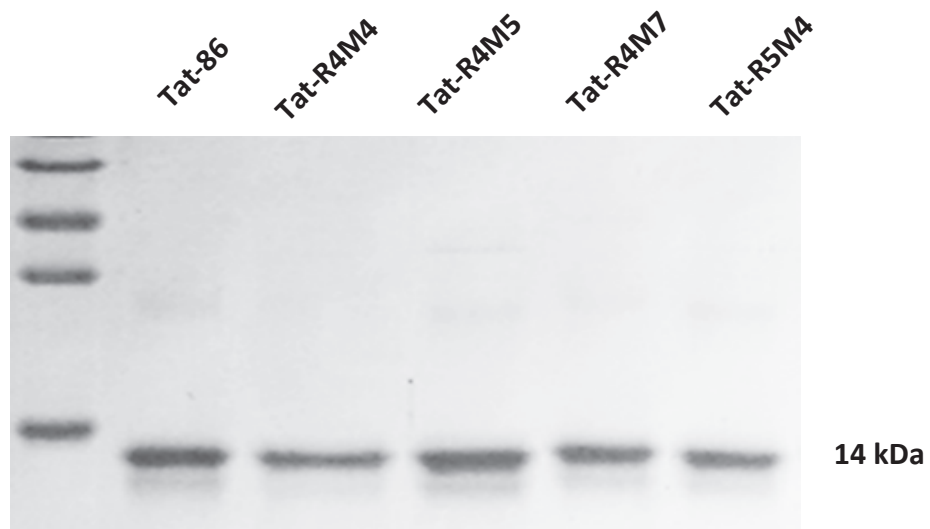

**Supplementary Figure 2 : Purification of Tat-86, Tat-R4M4, R4M5, R4M7 and R5M4.** The proteins were expressed in DE3 E.Coli and purified through heparin-agarose chromatography and subsequent ion exchange chromatography. After eliminating endotoxin, the proteins were subjected to SDS-PAGE.

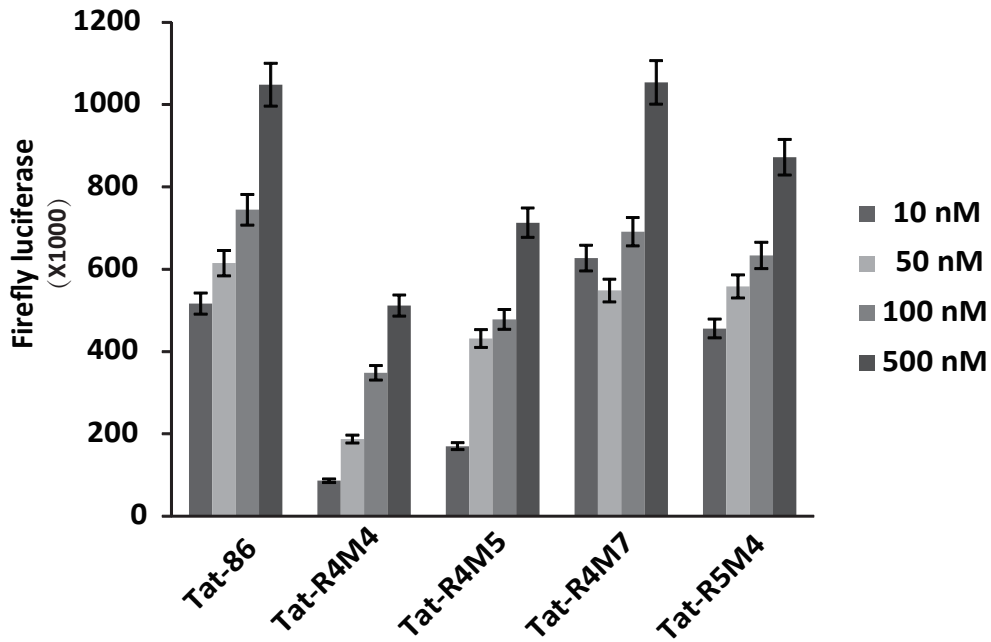

**Supplementary Figure 3: Transactivation activities of various Tat mutants.** The TZM-bl cells were co-cultured with Tat-R4M4, Tat-R4M5, Tat-R4M7, or Tat-R5M4 recombinant proteins at the concentrations of 10 nM, 50 nM, 100 nM, or 500 nM, the luciferase activity was analyzed after 2 days.

a

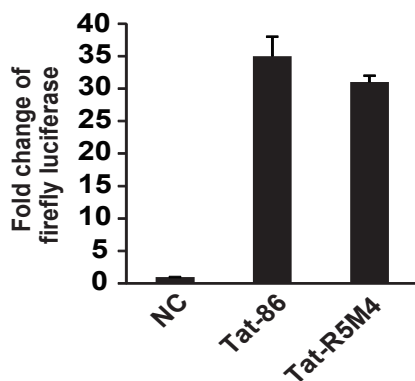

b

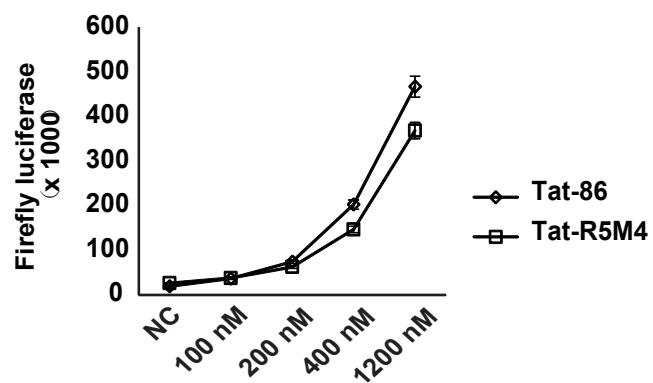

**Supplementary Figure 4:** Transactivation activity of purified Tat protein in TZM-bl cells. (a) 500nM Purified Tat-86 or Tat-R5M4 proteins were added into culture medium of TZM-bl cells, and Firefly Luciferase activity was analyzed after 2 days. (b) a dose-dependent experiment was performed.

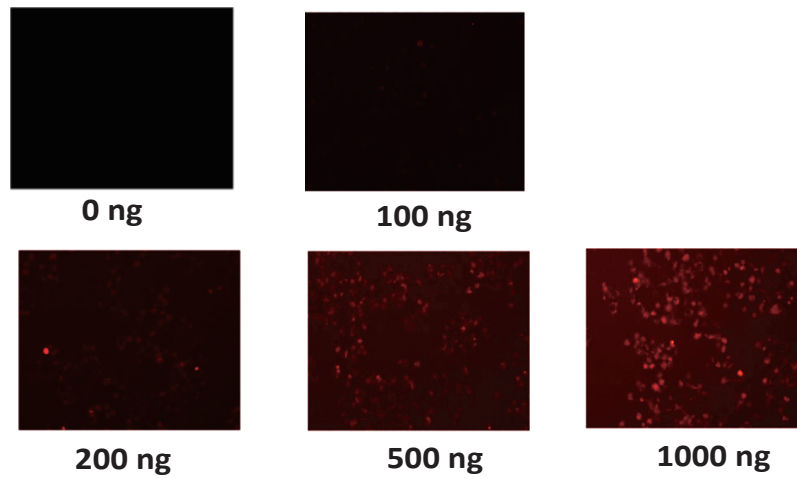

**Supplementary Figure 5: Rhodamine-labeled Tat-R5M4 showed capability to enter the cells in a dose-dependent manner.** Tat-R5M4 was labeled with NHS-rhodamine and added to the supernatant of TzM-bl cells. Cells were washed with PBS after 6 hours and the distribution of fluorescence was observed with fluorescence microscopy.

**a**

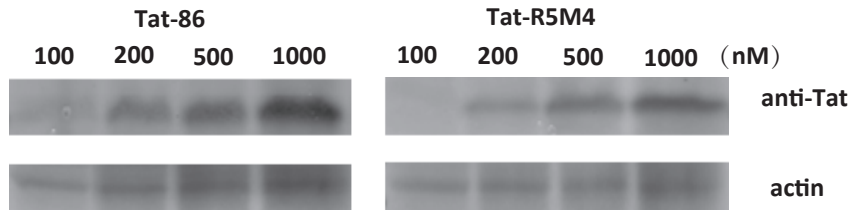

**b**

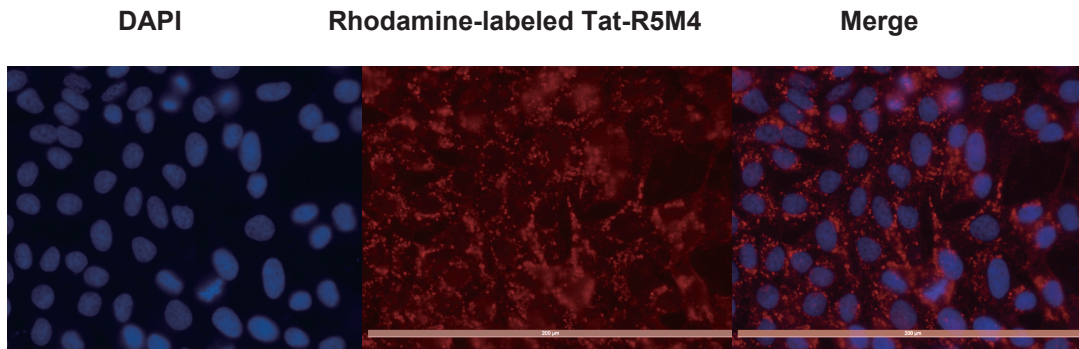

**Supplementary Figure 6: Transmembrane activity of Tat-86 and Tat-R5M4 *in vitro*.**

(a) TZM-bl cells were co-cultured with Tat-86 or Tat-R5M4 at the concentration of 100nM, 200nM, 500nM or 1000nM. After 2 days, cells were washed and lysed. Western blotting was performed with monoclonal anti-Tat antibody. (b) TZM-bl cells were seeded onto 35-mm glass-bottom culture dishes (MatTek) and treated with 500nM Rhodamine-labeled Tat-R5M4 for 6 hours. Cells were washed and stained with DAPI, and observed with fluorescence microscope.



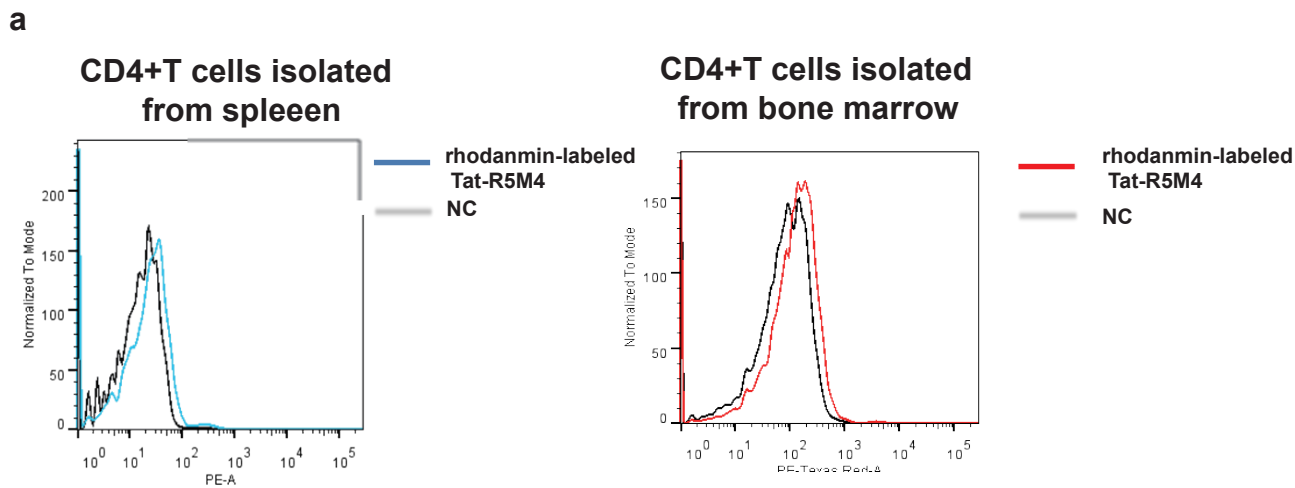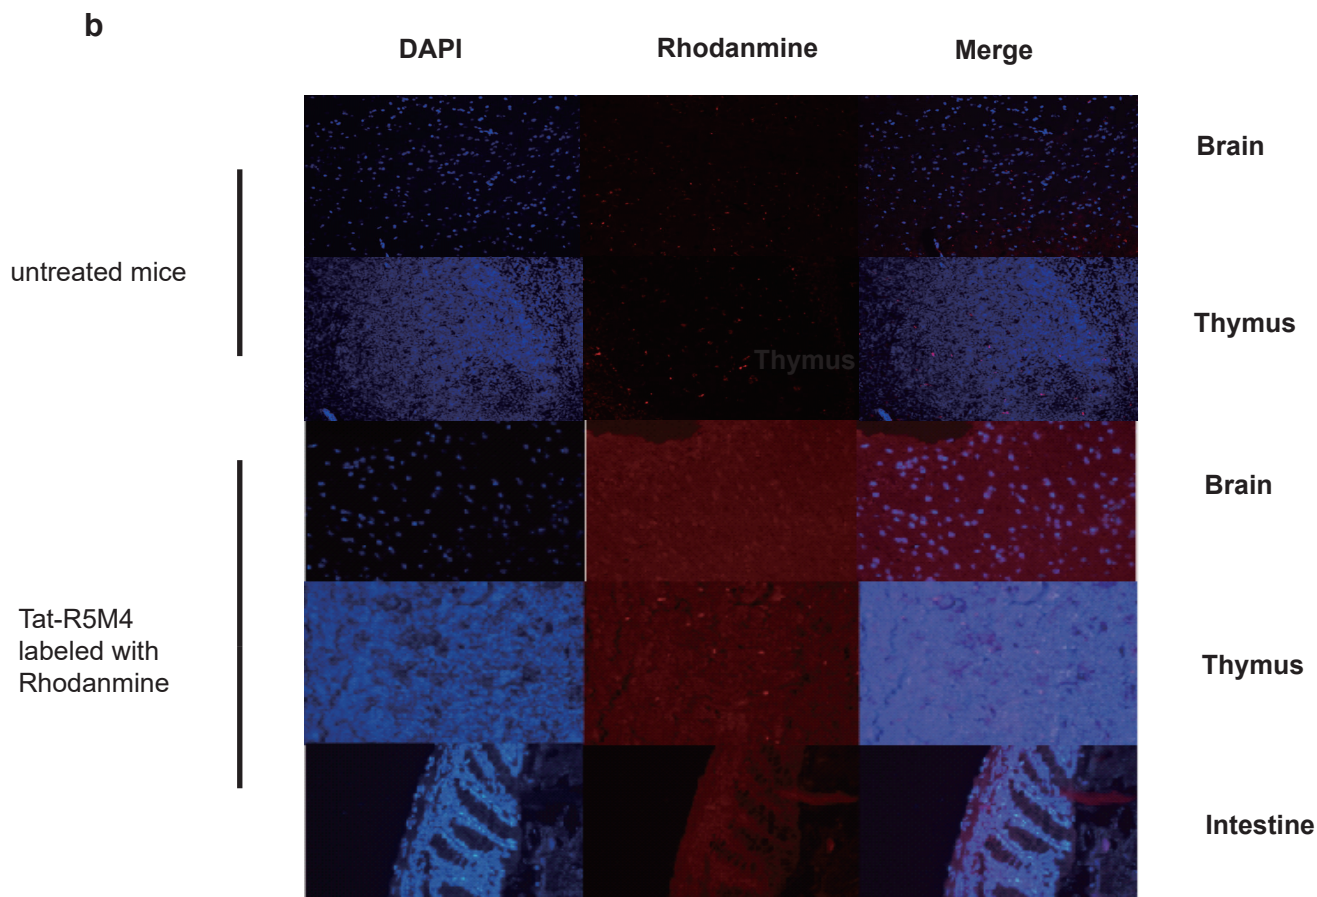

**Supplementary Figure 7: Transmembrane ability of Tat-R5M4 *in vivo*.**

Tat-R5M4 was labeled with NHS-rhodamine and intravenously injected into BABL/c mice. (a) The CD4+ T-lymphocytes from both spleen and bone marrow were isolated and analyzed by FACS. (b) Brain, thymus and intestine were dissected, stained with DAPI and subjected to fluorescence microscopy analysis.

a

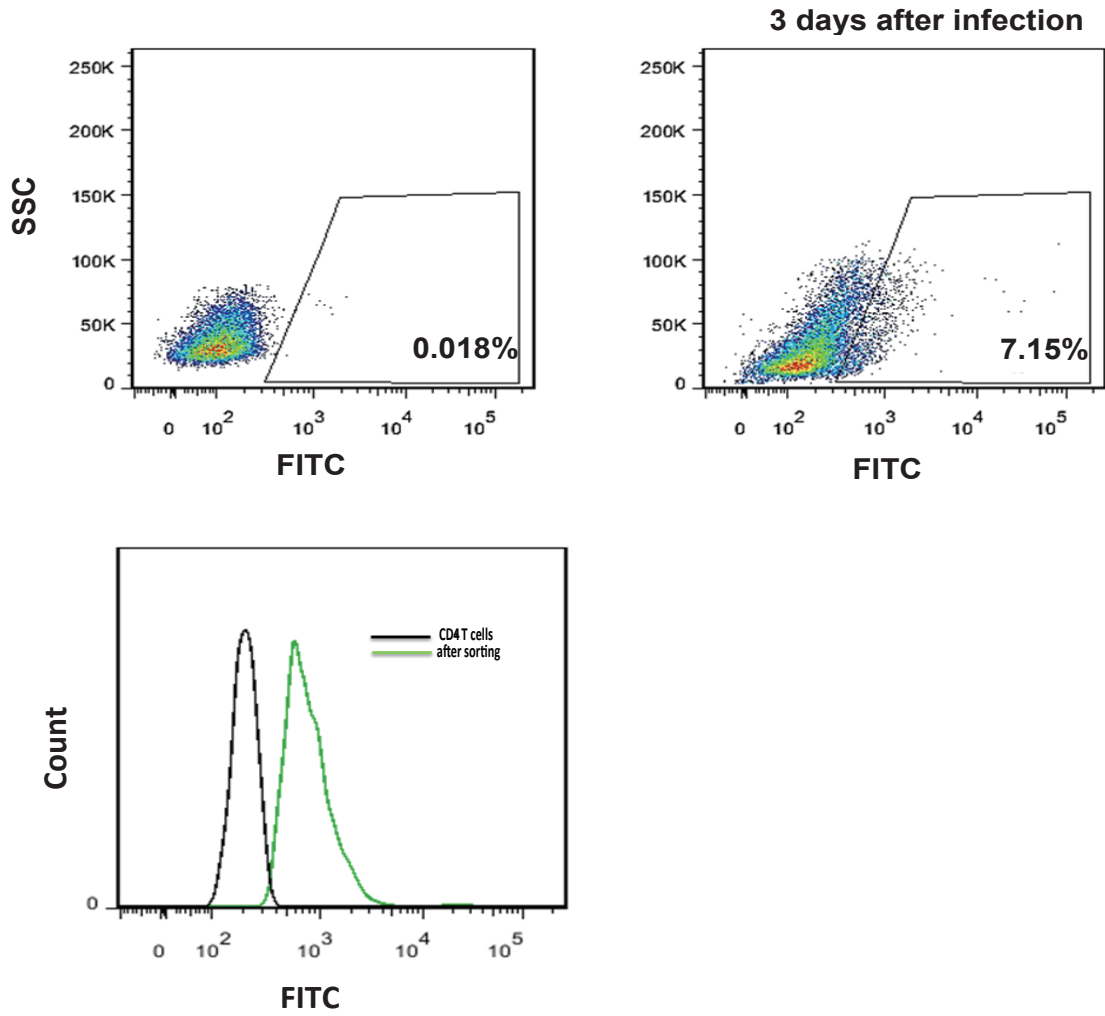

b

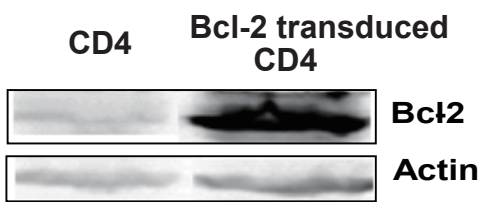

c

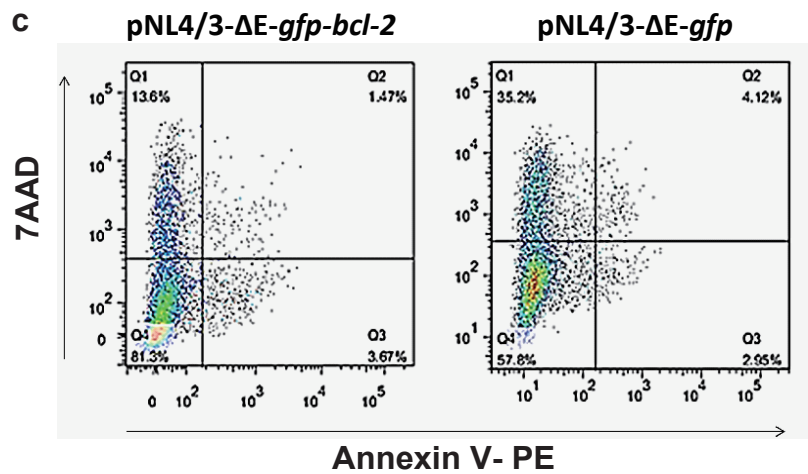

d

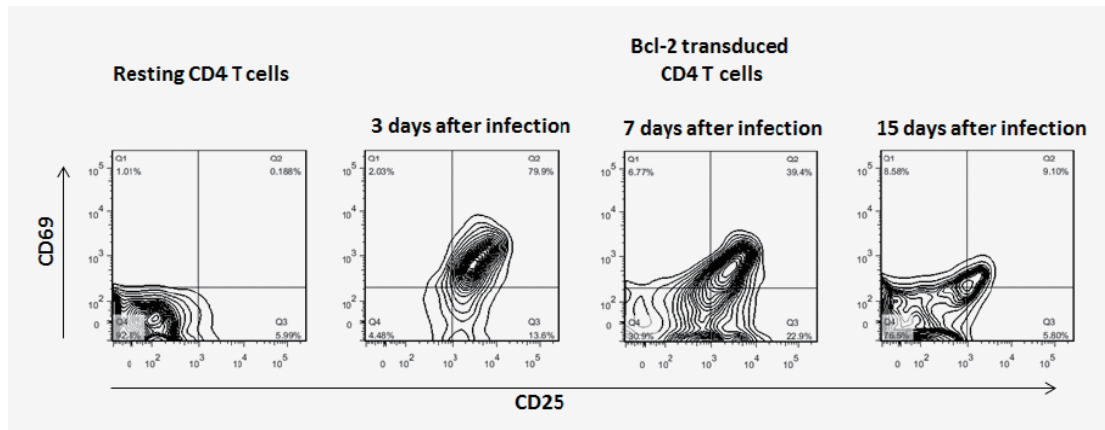

e

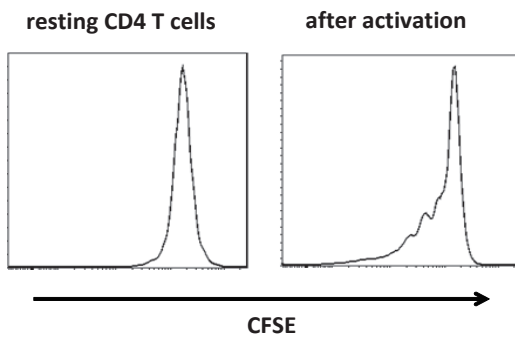

f

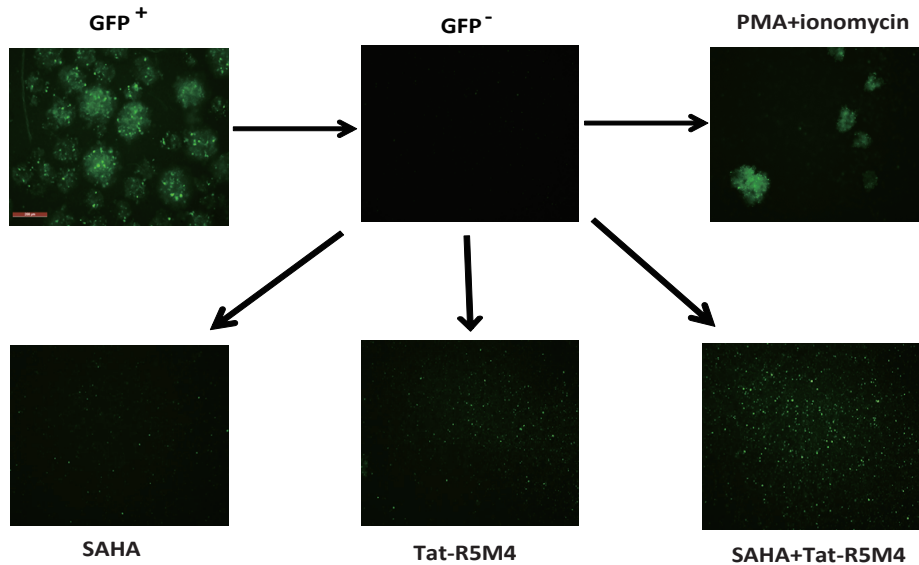

**Supplementary Figure 8: The generation of latency model in vitro. The activated CD4<sup>+</sup> T lymphocytes were infected with HIV-1/VSV pseudoviruses.**(a) GFP-positive cells were sorted out and lysed, (b) western blotting was performed with anti-Bcl-2 antibody. (c) Proportions of apoptosis were compared between the cells infected with pseudovirus with or without Bcl-2 expression. (d) The resting state of latently infected CD4<sup>+</sup> T cells were analyzed with FACS. (e) Proliferation of latently infected CD4<sup>+</sup> T cells after activation. (f) Activation of latently infected CD4<sup>+</sup> T cells with PMA/ionomycin, SAHA, Tat-R5M4 or SAHA plus Tat-R5M4. Two days after activation, green fluorescence was observed with fluorescence microscopy.

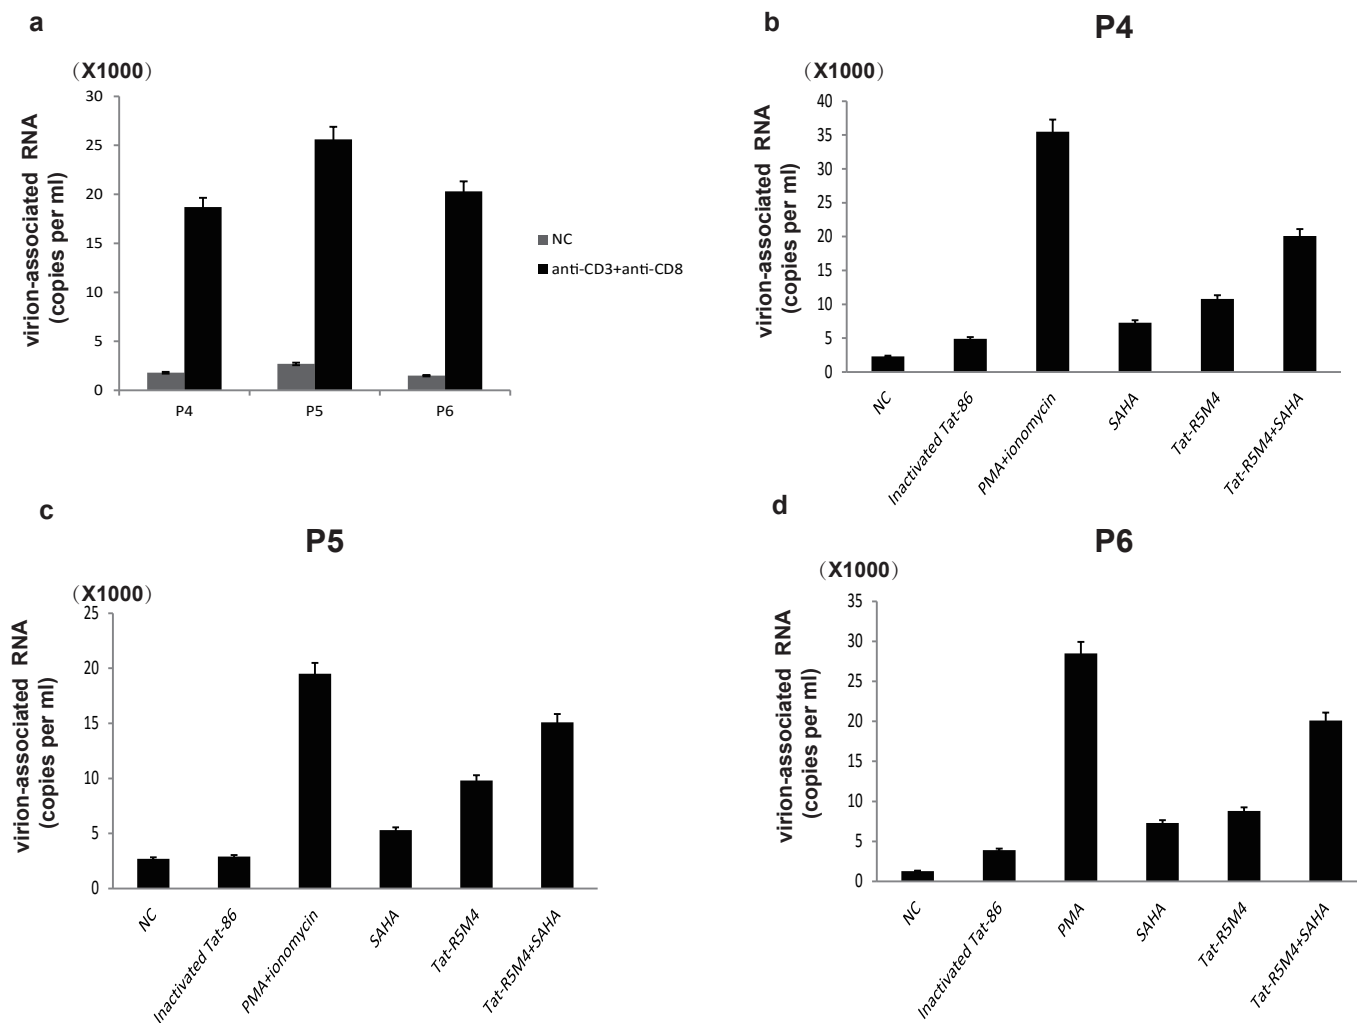

**Supplementary Figure 9: Activation of the latently-infected CD4+ T-lymphocytes from HIV-1-infected individuals receiving suppressive ART by Tat-R5M4.** (a) CD4+ T-lymphocytes from patients 4-6 were isolated and activated by anti-CD3 and anti-CD28 antibodies. (b,c,d) The CD4+ T-lymphocytes isolated from HIV-1-infected individuals were cultured in the RPMI1640 conditioned medium and activated with PMA plus ionomycin, inactivated Tat, SAHA, Tat-R5M4, or SAHA plus Tat-R5M4. After 48 h, the viral particles in supernatant were harvested and viral RNA was extracted and quantitatively analyzed by real-time RT-PCR.

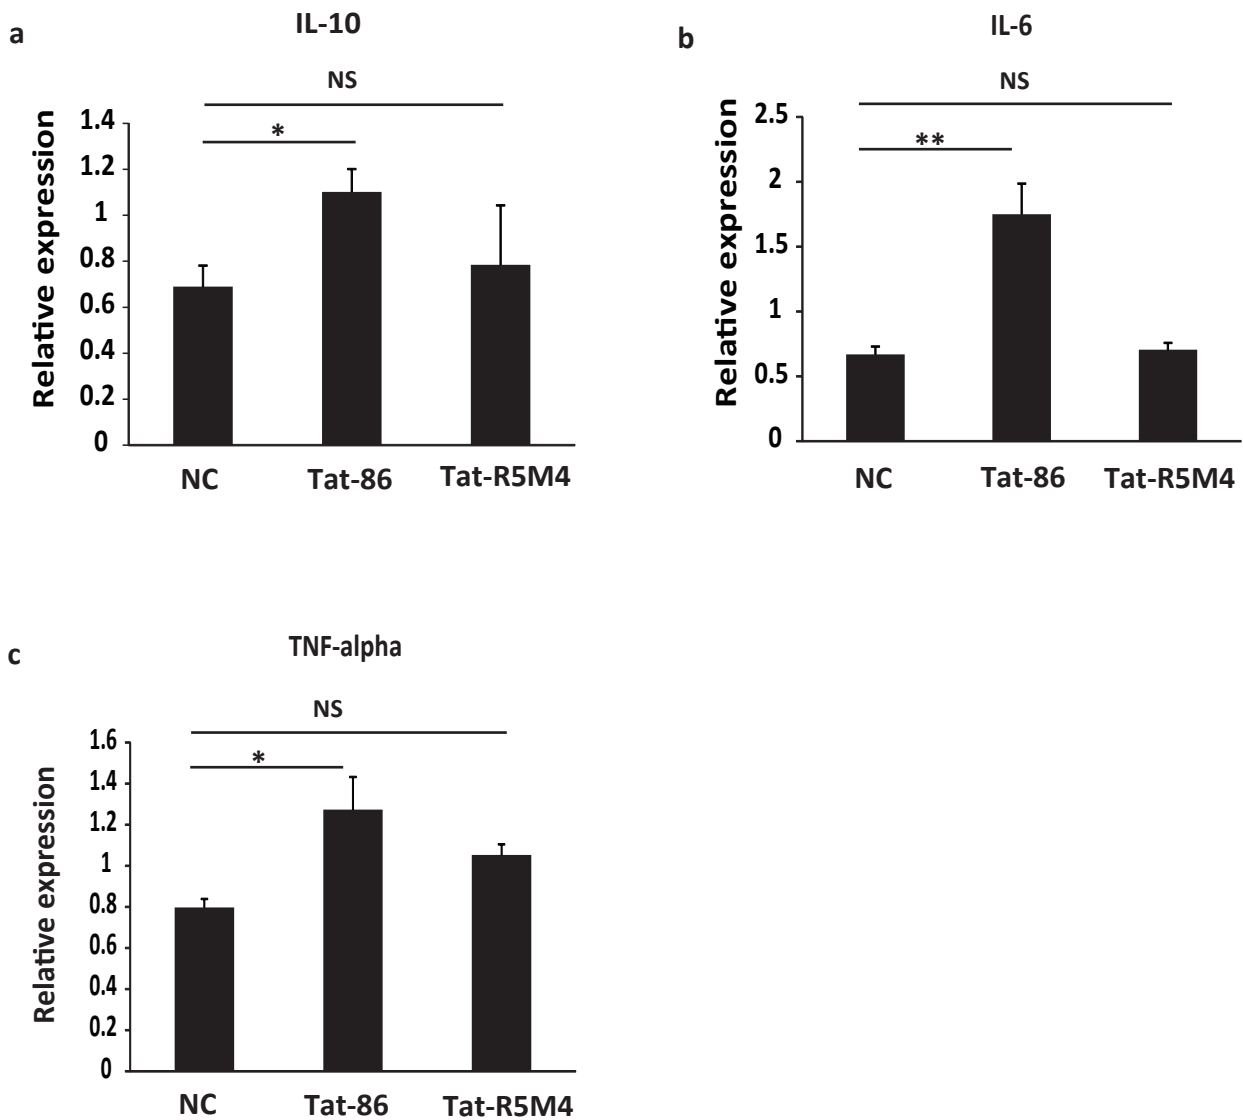

**Supplementary Figure 10: Tat-R5M4 had the lower ability than wild-type Tat to induce the secretion of cytokines.** The CD14-positive monocytes were isolated from healthy donors and then co-cultured with purified Tat-86 or Tat-R5M4 for 6 hours. Total RNA was extracted with Trizol reagent and reverse transcribed. The transcriptional expression of IL-10, IL-6 and TNF-alpha were analyzed with real-time RT-PCR. \* $p < 0.05$ , \*\*  $p < 0.01$ , NS, not significant in a paired  $t$  test.

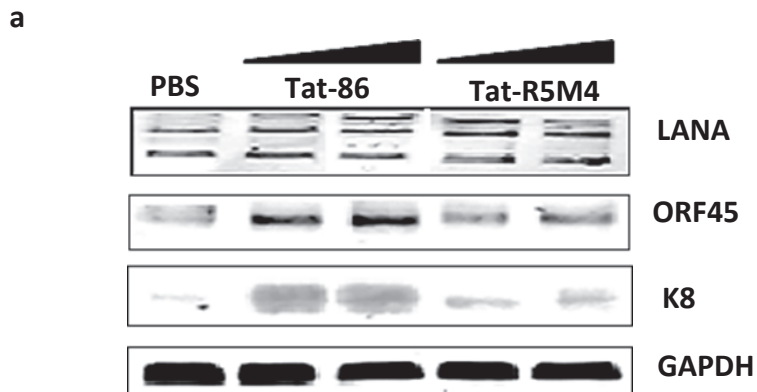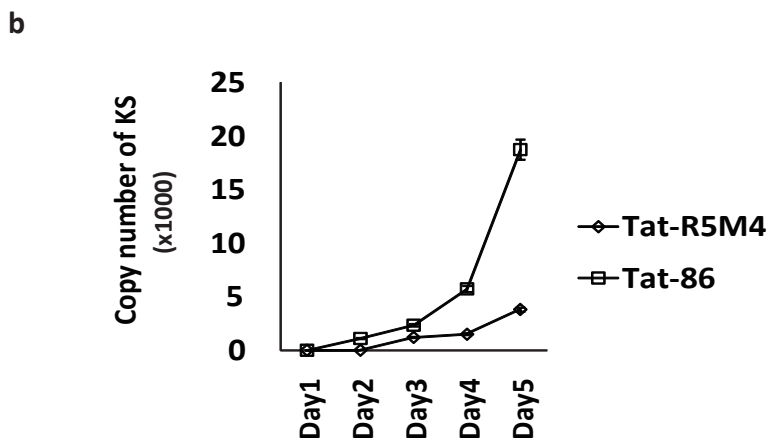

**Supplementary Figure 11: Tat-R5M4 reduced the ability of Tat-86 to induce the replication and expression of Kaposi's sarcoma herpes virus (KSHV).** Bcbl-1 cells were treated with Tat-86 or Tat-R5M4 for 5 days. (a) Expression of LANA, ORF45 and K8 were analyzed with western blotting, and (b) the amount of KSHV DNA in the supernatant was analyzed with real-time PCR.
